# Supplementary material for: Preparation of photoreactive nanocellulosic materials via benzophenone grafting
Source: Royal Society of Chemistry journal article supplement (doi:10.1039/c6ra15015b), 2016-01-01
Supplement: c6ra15015b1.pdf [file c6ra15015b1.pdf]

## SUPPORTING INFORMATION

# Preparation of photoreactive nanocellulosic material via benzophenone grafting

*Hannes Orelma<sup>1,2,&,\*</sup>, Maija Vuoriluoto<sup>1</sup>, Leena-Sisko Johansson<sup>1</sup>, Joseph M. Campbell<sup>1</sup>, Ilari Filpponen<sup>1</sup>, Markus Biesalski<sup>2</sup>, Orlando J. Rojas<sup>1</sup>*

<sup>1</sup>Aalto University, School of Chemical Technology, Department of Forest Products Technology, PL 11000, 00076 Aalto, Espoo, Finland.

<sup>2</sup>Laboratory of Macromolecular Chemistry and Paper Chemistry, Department of Chemistry, Technische Universität Darmstadt, 64287 Darmstadt, Germany

<sup>&</sup>Present address: VTT, Technical Research Centre of Finland, Biologinkuja 7, P.O. Box 1000, FIN-02044 VTT, Finland

KEYWORDS: CNF, benzophenone, EDC/NHS, grafting, UV-crosslinking, CNF-films

### Table of Contents

|                                                                                   |   |
|-----------------------------------------------------------------------------------|---|
| Figure S1. AFM image of prepared CNF with and without benzophenone grafting ..... | 2 |
| Figure S2. Swelling of BP-CNF mixed films in water .....                          | 3 |
| Figure S3. Mechanical strength of UV-crosslinked CNF films by sonification.....   | 4 |

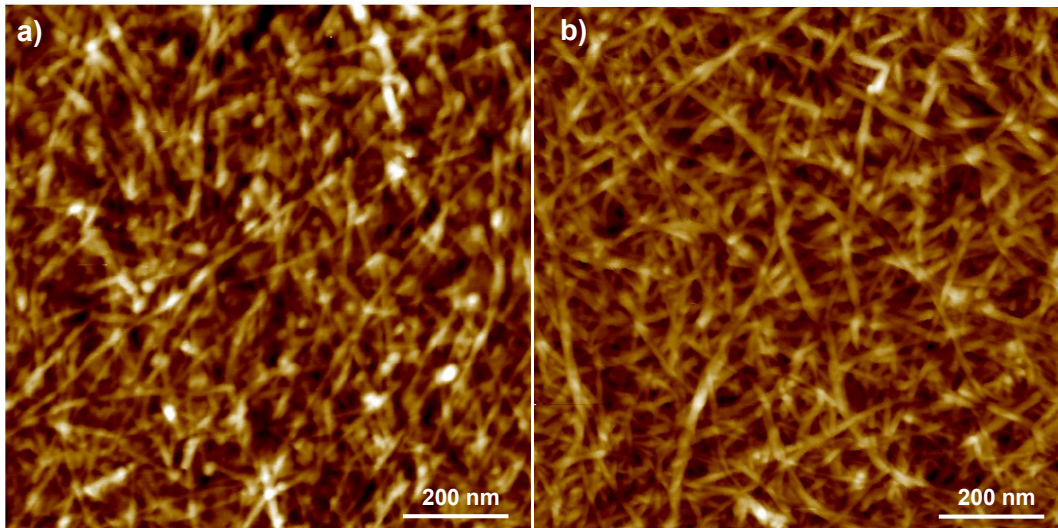

Figure S1. AFM height images of a) unmodified TOCNF and b) BP-TOCNF surfaces.

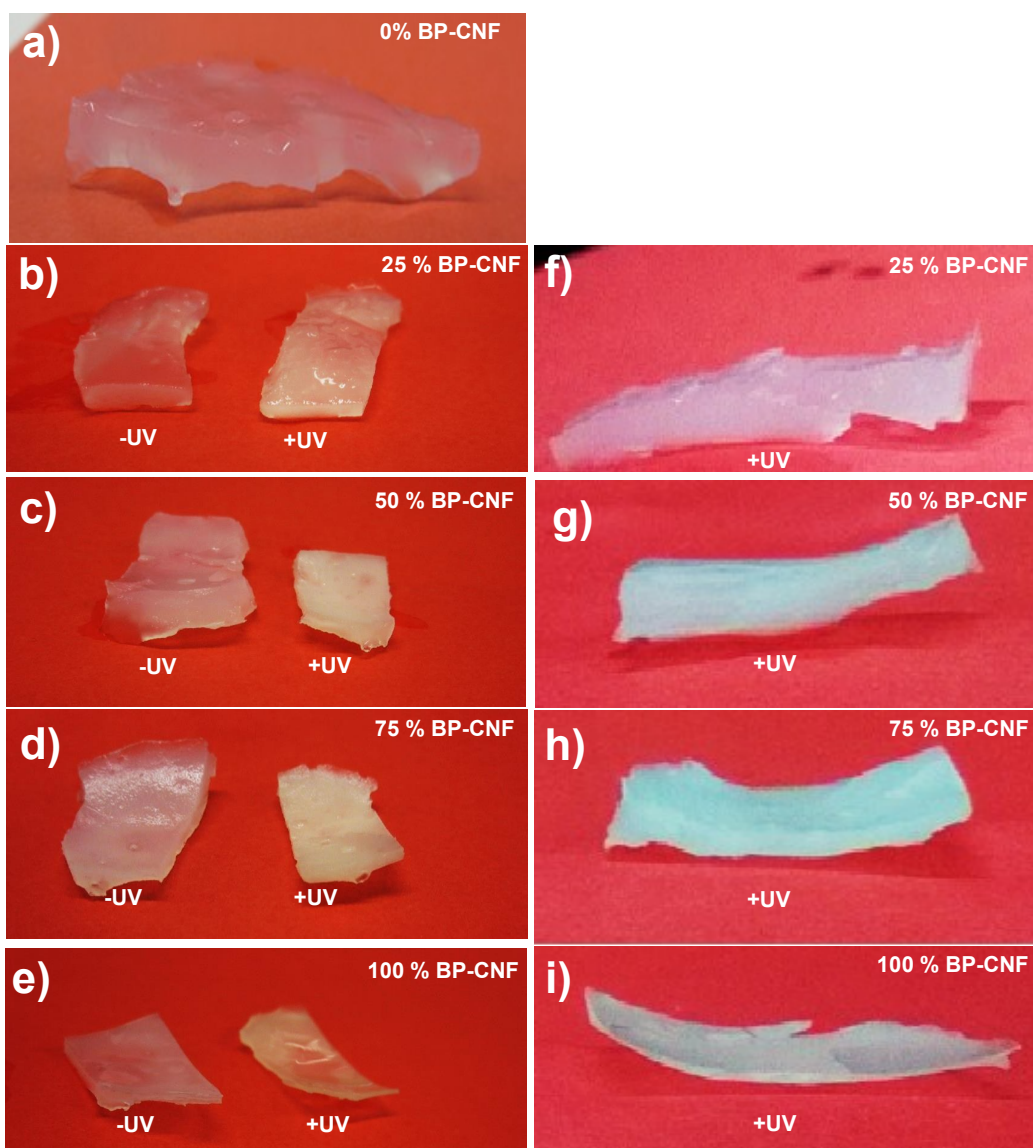

Figure S2. Wet TOCNF/BP-TOCNF mixed films with and without UV-activation a-e). The portion of BP-TOCNF added varied from 0 to 100%. All samples were kept overnight in water and picture when still wet. Side views of TOCNF/BP-TOCNF mixed films with UV-activation f-i).

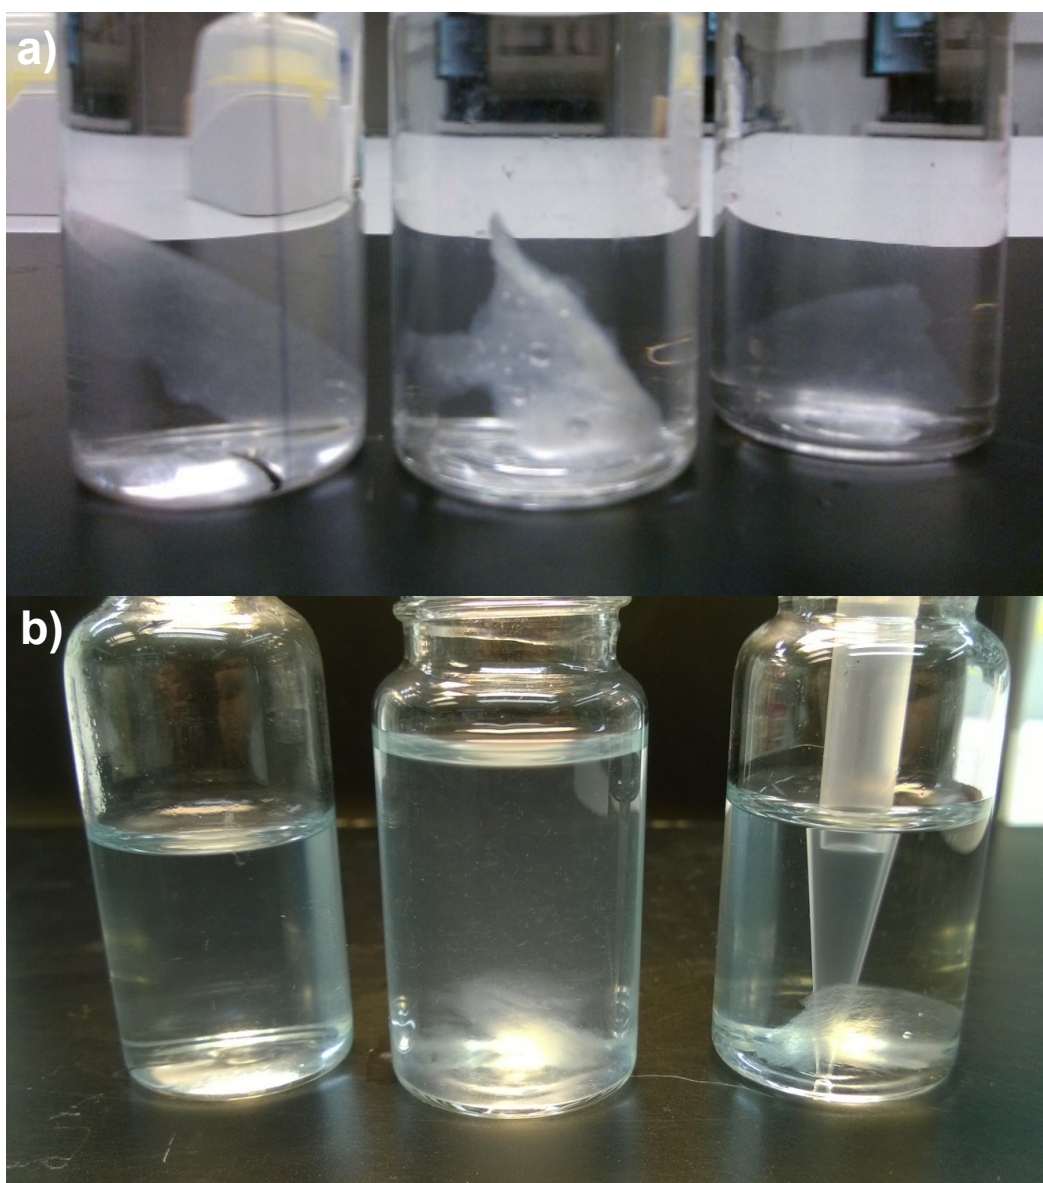

Figure S3. Photo images of TOCNF, BP-TOCNF without UV-activation, and BP-TOCNF after UV-activation before a) and after b) high energy sonication. Image b), right, shows a jet of a pipet that was utilize to lift the BP-TOCNF film in order to capture more clearly the image.
